# Supplementary material
Source: publisher figshare collection journal article supplement (https://acs.figshare.com/ndownloader/files/6955004)
Supplement: Supplementary file 1 [file 6955004]

## Sheet: TableS10
		R2	R3	R5	R6	Σσ	E°	E°	E°	pKa,1	pKa,2	pKa,3	E°	E°
							[Q/Q–]	[Q–/Q2–]	[HQ/HQ–]	[HQ–]	[H2Q]	[HQ]	[Q, H+/HQ–]	[Q, 2H+/H2Q]
2-monosubstituted	1	H	H	H	H	0	0.099	0.023	0.45	11.4	9.85	4.1	0.398	0.69
	2	C6H5	H	H	H	-0.01	0.072	0.052	0.415	10.88	8.5	4.66	0.384	0.635
	3	CH3	H	H	H	-0.17	0.007	-0.03	0.349	11.39	10.52	4.9	0.325	0.636
	4	C(CH3)3	H	H	H	-0.2	-0.041	-0.096	0.32	12.25	10.4	5.13	0.294	0.602
	5	OCH3	H	H	H	-0.26	-0.039	-0.049	0.309	11.27	9.53	5.14	0.289	0.571
	6	N(CH3)2	H	H	H	-0.83	-0.221	-0.144	0.124	12.32	9.6	7.72	0.182	0.466
	7	NH2	H	H	H	-0.66	-0.193	-0.117	0.042	11.16	9.5	8.39	0.175	0.456
	8	CH2CH3	H	H	H	-0.15	-0.025	-0.068	0.321	11.71	10.32	5.05	0.3	0.605
	9	OH	H	H	H	-0.37	0.013	-0.025	0.333	11.03	9.64	4.89	0.32	0.605
	10	OCH2CH3	H	H	H	-0.28	-0.07	-0.069	0.3	11.51	9.13	5.18	0.271	0.541
	11	F	H	H	H	0.34	0.231	0.153	0.559	9.32	7.43	2.37	0.467	0.687
	12	Cl	H	H	H	0.37	0.242	0.195	0.595	9.21	7.28	2.35	0.491	0.706
	13	Br	H	H	H	0.39	0.243	0.191	0.618	9.8	5.58	2.51	0.507	0.672
	14	SH	H	H	H	0.15	0.11	0.086	0.436	10.31	8.85	4.31	0.403	0.665
	15	SiH3	H	H	H	0.1	0.156	0.07	0.493	10.5	7.89	3.27	0.423	0.657
	16	CHO	H	H	H	1.03	0.393	0.362	0.635	9.23	8.6	4.54	0.65	0.905
	17	COOCH3	H	H	H	0.75	0.339	0.26	0.594	11.32	7.81	5.6	0.635	0.866
	18	CF3	H	H	H	0.54	0.365	0.263	0.716	9.13	5.03	1.39	0.584	0.733
	19	CN	H	H	H	1	0.479	0.401	0.853	8.32	3.11	0.6	0.686	0.778
	20	COOH	H	H	H	0.77	0.592	-0.068	0.621	10.16	8.02	5.15	0.644	0.799
	21	SO3-	H	H	H	0.58	0.184	0.16	0.504	11.17	9.25	5.27	0.502	0.776
	22	NO2	H	H	H	1.27	0.613	0.688	1.007	6.15	3.56	0.69	0.833	0.938
	23	COCH3	H	H	H	0.84	0.276	0.299	0.573	11.92	8.08	7.2	0.64	0.879
2-3-disubstituted	24	C6H5	C6H5	H	H	-0.02	0.012	0.008	0.381	11.12	9.06	4.73	0.339	0.607
	25	CH3	CH3	H	H	-0.34	-0.09	-0.133	0.297	12.64	10.21	5.28	0.262	0.564
	26	C(CH3)3	C(CH3)3	H	H	-0.4	-0.385	-0.249	0.099	12.33	10.4	6.36	0.047	0.355
	27	OCH3	OCH3	H	H	-0.52	-0.048	0.065	0.404	10.97	7.77	5.17	0.333	0.563
	28	N(CH3)2	N(CH3)2	H	H	-1.66	-0.301	-0.117	0.236	11.11	9.43	5.07	0.119	0.398
	29	NH2	NH2	H	H	-1.32	-0.172	-0.144	0.101	10.46	7.85	6.24	0.152	0.384
	30	CH2CH3	CH2CH3	H	H	-0.3	-0.113	-0.118	0.257	11.94	10.51	5.53	0.238	0.549
	31	OH	OH	H	H	-0.74	0.041	0.028	0.37	10.28	6.38	4.43	0.339	0.527
	32	OCH2CH3	OCH2CH3	H	H	-0.56	-0.086	0.137	0.373	10.61	8.14	6.55	0.34	0.581
	33	F	F	H	H	0.68	0.374	0.282	0.706	6.7	4.9	-0.55	0.526	0.671
	34	Cl	Cl	H	H	0.74	0.342	0.32	0.726	6.52	4.7	-0.44	0.524	0.663
	35	Br	Br	H	H	0.78	0.33	0.315	0.699	7.2	4.9	0.63	0.536	0.681
	36	SH	SH	H	H	0.3	0.112	0.851	0.271	-4.47	7.5	5.24	0.349	0.571
	37	SiH3	SiH3	H	H	0.2	0.191	0.237	0.589	7.98	6.6	1.96	0.45	0.645
	38	CHO	CHO	H	H	2.06	0.658	0.835	1.064	6.6	1.08	2.65	0.942	0.974
	39	COOCH3	COOCH3	H	H	1.5	0.445	0.417	0.732	9.33	5.39	3.92	0.707	0.866
	40	CF3	CF3	H	H	0.54	0.365	0.263	0.716	9.13	5.03	1.39	0.584	0.733
	41	CN	CN	H	H	2	0.886	0.856	1.21	1.47	-0.09	-4.6	0.914	0.912
	42	COOH	COOH	H	H	1.54	0.77	0.125	0.819	7.75	4.71	3.3	0.766	0.817
	43	SO3-	SO3-	H	H	1.16	0.184	0.265	0.535	12.68	6.7	8.04	0.6	0.798
	44	NO2	NO2	H	H	2.54	0.983	1.378	1.46	-2.21	-3.63	-3.68	1.115	1.007
	45	COCH3	COCH3	H	H	1.68	0.421	0.433	0.833	8.86	3.34	2.02	0.689	0.788
2,5-disubstituted	46	C6H5	H	C6H5	H	-0.02	0.041	0.104	0.404	9.42	9.55	4.27	0.351	0.634
	47	CH3	H	CH3	H	-0.34	-0.092	-0.081	0.348	12.55	9.77	5.21	0.285	0.574
	48	C(CH3)3	H	C(CH3)3	H	-0.4	-0.193	-0.193	0.201	12.78	11.35	6.04	0.185	0.52
	49	OCH3	H	OCH3	H	-0.52	-0.146	-0.233	0.12	10.91	11.01	4.86	0.133	0.459
	50	N(CH3)2	H	N(CH3)2	H	-1.66	-0.602	-0.284	-0.043	12.53	12.18	8.39	-0.072	0.288
	51	NH2	H	NH2	H	-1.32	-0.614	-0.36	-0.233	10.43	9.96	8.21	-0.178	0.116
	52	CH2CH3	H	CH2CH3	H	-0.3	-0.172	-0.168	0.214	12.11	11.02	5.56	0.188	0.514
	53	OH	H	OH	H	-0.74	-0.142	-0.108	0.237	10.85	9.76	4.94	0.196	0.485
	54	OCH2CH3	H	OCH2CH3	H	-0.56	-0.285	-0.19	0.099	11.07	9.98	6.11	0.09	0.385
	55	F	H	F	H	0.68	0.344	0.27	0.691	6.82	5.35	-0.36	0.509	0.667
	56	Cl	H	Cl	H	0.74	0.372	0.356	0.751	6.21	5.78	-0.56	0.547	0.718
	57	Br	H	Br	H	0.78	0.377	0.352	0.744	6.91	5.43	0.21	0.569	0.73
	58	SH	H	SH	H	0.3	0.1	0.136	0.486	8.46	8.35	2.46	0.368	0.615
	59	SiH3	H	SiH3	H	0.2	0.194	0.151	0.545	9.2	7.78	2.46	0.445	0.675
	60	CHO	H	CHO	H	2.06	0.628	0.569	0.953	8.8	7.61	2.23	0.858	1.083
	61	COOCH3	H	COOCH3	H	1.5	0.49	0.398	0.841	11.54	9.2	3.99	0.786	1.058
	62	CF3	H	CF3	H	1.08	0.614	0.487	0.959	5.47	3.05	-2.59	0.712	0.803
	63	CN	H	CN	H	2	0.814	0.72	1.149	2.88	0.8	-4.47	0.852	0.876
	64	COOH	H	COOH	H	1.54	0.997	-0.252	0.901	10.43	8.22	2.96	0.812	0.924
	65	SO3-	H	SO3-	H	1.16	0.307	0.27	0.637	10.5	9.82	4.21	0.599	0.889
	66	NO2	H	NO2	H	2.54	0.981	0.975	1.362	3.51	1.57	-3.12	1.081	1.128
	67	COCH3	H	COCH3	H	1.68	0.463	0.363	0.718	11.04	11.39	4.96	0.739	1.076
2,6-disubstituted	68	C6H5	H	H	C6H5	-0.02	0.019	0.07	0.364	10.15	8.59	5.09	0.345	0.599
	69	CH3	H	H	CH3	-0.34	-0.088	-0.095	0.241	11.81	9.98	6.05	0.258	0.553
	70	C(CH3)3	H	H	C(CH3)3	-0.4	-0.192	-0.274	0.124	13.18	10.49	6.37	0.157	0.467
	71	OCH3	H	H	OCH3	-0.52	-0.154	-0.123	0.148	11.96	9.37	7.3	0.215	0.493
	72	N(CH3)2	H	H	N(CH3)2	-1.66	-0.468	-0.255	-0.017	13.48	10.16	9.38	0.037	0.338
	73	NH2	H	H	NH2	-1.32	-0.345	-0.265	-0.143	10.99	8.97	8.86	0.02	0.285
	74	CH2CH3	H	H	CH2CH3	-0.3	-0.142	-0.143	0.199	11.73	10.19	5.86	0.204	0.506
	75	OH	H	H	OH	-0.74	-0.034	-0.06	0.263	10.68	8.43	5.14	0.269	0.518
	76	OCH2CH3	H	H	OCH2CH3	-0.56	-0.173	-0.167	0.164	11.66	8.91	5.98	0.175	0.438
	77	F	H	H	F	0.68	0.382	0.286	0.679	7.34	4.21	0.61	0.551	0.675
	78	Cl	H	H	Cl	0.74	0.389	0.35	0.745	7.24	3.34	0.49	0.584	0.683
	79	Br	H	H	Br	0.78	0.387	0.358	0.776	8.25	3.97	1.1	0.616	0.734
	80	SH	H	H	SH	0.3	0.135	0.149	0.439	8.77	4.94	3.78	0.402	0.548
	81	SiH3	H	H	SiH3	0.2	0.203	0.148	0.569	10.1	4.77	2.9	0.474	0.615
	82	CHO	H	H	CHO	2.06	0.634	0.673	0.99	7.67	4.76	2.23	0.88	1.021
	83	COOCH3	H	H	COOCH3	1.5	0.518	0.437	0.775	8.86	6.76	3.07	0.74	0.939
	84	CF3	H	H	CF3	1.08	0.62	0.496	1.025	7.67	0.4	-1.34	0.785	0.797
	85	CN	H	H	CN	2	0.815	0.734	1.285	6.61	-3.25	-2.79	0.97	0.874
	86	COOH	H	H	COOH	1.54	0.988	-0.106	0.809	7.75	6.01	3.04	0.788	0.847
	87	SO3-	H	H	SO3-	1.16	0.302	0.269	0.614	9.73	8	3.82	0.574	0.81
	88	NO2	H	H	NO2	2.54	0.944	1.081	1.488	3.03	-1.87	-3.93	1.102	1.047
	89	COCH3	H	H	COCH3	1.68	0.375	0.513	0.74	9.33	6.95	5.42	0.72	0.926
2,3,5-trisubstituted	90	C6H5	C6H5	C6H5	H	-0.03	-0.024	0.014	0.334	11.12	8.93	5.64	0.324	0.588
	91	CH3	CH3	CH3	H	-0.51	-0.211	-0.192	0.162	12.18	11.04	6.1	0.158	0.485
	92	C(CH3)3	C(CH3)3	C(CH3)3	H	-0.6	-0.56	-0.468	-0.088	14.69	10.41	8.18	-0.079	0.229
	93	OCH3	OCH3	OCH3	H	-0.78	-0.213	-0.01	0.233	10.97	8.19	6.78	0.213	0.455
	94	N(CH3)2	N(CH3)2	N(CH3)2	H	-2.49	-0.699	-0.262	-0.136	15.34	13.41	13.13	-0.027	0.37
	95	NH2	NH2	NH2	H	-1.98	-0.556	-0.361	-0.163	11.14	8.41	7.71	-0.129	0.12
	96	CH2CH3	CH2CH3	CH2CH3	H	-0.45	-0.223	-0.205	0.125	12.45	11.38	6.79	0.154	0.491
	97	OH	OH	OH	H	-1.11	-0.079	-0.03	0.246	9.78	7.06	5.05	0.235	0.444
	98	OCH2CH3	OCH2CH3	OCH2CH3	H	-0.84	-0.29	0.048	0.236	11.02	8.8	7.75	0.205	0.465
	99	F	F	F	H	1.11	0.499	0.405	0.824	5.21	2.88	-1.95	0.606	0.691
	100	Cl	Cl	Cl	H	1.17	0.472	0.472	0.877	5.2	2.46	-1.73	0.626	0.698
	101	Br	Br	Br	H	0.45	0.462	0.477	0.848	5.86	2.61	-0.5	0.643	0.72
	102	SH	SH	SH	H	0.45	0.117	0.217	0.511	8.12	2.82	3.07	0.407	0.491
	103	SiH3	SiH3	SiH3	H	0.3	0.233	0.272	0.611	7.51	4.61	1.69	0.475	0.611
	104	CHO	CHO	CHO	H	3.09	0.796	0.978	1.257	6.25	3.2	1.46	1.072	1.167
	105	COOCH3	COOCH3	COOCH3	H	2.25	0.586	0.559	0.938	9.35	6.91	2.85	0.849	1.053
	106	CF3	CF3	CF3	H	1.62	0.845	0.748	1.292	4.12	-1.47	-5.16	0.918	0.875
	107	CN	CN	CN	H	3	1.178	1.122	1.553	-0.55	-5.62	-7.93	1.134	0.968
	108	COOH	COOH	COOH	H	2.31	1.149	-0.065	1.06	8.42	5.92	2.01	0.929	0.966
	109	SO3-	SO3-	SO3-	H	1.74	0.256	0.353	0.646	12.19	8.01	7.16	0.665	0.902
	110	NO2	NO2	NO2	H	3.81	1.261	1.51	1.701	-3.92	-4.13	-7.22	1.269	1.147
	111	COCH3	COCH3	COCH3	H	2.52	0.557	0.518	0.935	11.08	1.13	3.96	0.865	0.898
2,3,5,6-tetrasubstituted	112	C6H5	C6H5	C6H5	C6H5	-0.04	-0.084	0.009	0.367	10.74	9.48	4.61	0.281	0.561
	113	CH3	CH3	CH3	CH3	-0.04	-0.084	0.009	0.367	10.74	9.48	4.61	0.281	0.561
	114	C(CH3)3	C(CH3)3	C(CH3)3	C(CH3)3	-0.8	-1.107	-0.804	-0.388	15.08	12.05	7.96	-0.509	-0.153
	115	OCH3	OCH3	OCH3	OCH3	-1.04	-0.229	0.111	0.37	9.42	8.27	4.96	0.22	0.465
	116	N(CH3)2	N(CH3)2	N(CH3)2	N(CH3)2	-3.32	-0.629	-0.322	-0.253	11.4	11.54	10.15	-0.138	0.203
	117	NH2	NH2	NH2	NH2	-2.64	-0.571	-0.456	-0.197	10.88	7.45	6.41	-0.192	0.028
	118	CH2CH3	CH2CH3	CH2CH3	CH2CH3	-0.6	-0.372	-0.347	0.066	13.23	11.89	6.16	0.032	0.384
	119	OH	OH	OH	OH	-1.48	-0.077	-0.039	0.295	8.14	6.62	2.41	0.183	0.379
	120	OCH2CH3	OCH2CH3	OCH2CH3	OCH2CH3	-1.12	-0.305	0.238	0.388	10.93	8.01	8.31	0.29	0.527
	121	F	F	F	F	1.36	0.638	0.531	0.986	2.9	2.07	-4.87	0.67	0.731
	122	Cl	Cl	Cl	Cl	1.48	0.564	0.588	1.003	2.93	0.73	-4.18	0.663	0.684
	123	Br	Br	Br	Br	1.56	0.539	0.581	0.96	3.37	2.03	-3.12	0.66	0.72
	124	SH	SH	SH	SH	0.6	0.111	0.279	0.526	4.96	3.76	0.69	0.342	0.453
	125	SiH3	SiH3	SiH3	SiH3	0.4	0.247	0.322	0.675	5.89	3.35	-0.16	0.459	0.558
	126	CHO	CHO	CHO	CHO	4.12	0.873	1.005	1.319	5.4	4.14	0.01	1.099	1.221
	127	COOCH3	COOCH3	COOCH3	COOCH3	3	0.744	0.68	1.064	6.66	4.84	0.09	0.909	1.052
	128	CF3	CF3	CF3	CF3	2.16	0.972	0.902	1.397	0	-3.53	-8.45	0.937	0.833
	129	CN	CN	CN	CN	4	1.48	1.43	1.832	-6.21	-8.33	-13.09	1.271	1.025
	130	COOH	COOH	COOH	COOH	3.08	1.278	0.068	1.143	5.82	4.56	0.03	0.97	0.98
	131	SO3-	SO3-	SO3-	SO3-	2.32	0.084	0.348	0.613	11.15	10.14	6.6	0.546	0.846
	132	NO2	NO2	NO2	NO2	5.08	1.613	1.662	1.939	-6.64	-7.09	-11.4	1.441	1.231
	133	COCH3	COCH3	COCH3	COCH3	3.36	0.663	0.657	0.914	3.66	3.27	-0.76	0.768	0.865
	134	CN	CN	Cl	Cl	2.74	1.096	1.079	1.461	-2.05	-4.82	-8.6	1.027	0.884
